# Supplementary material for: Design and synthesis of hydrophobic and chiral anions from amino acids as precursor for functional ionic liquids
Source: Royal Society of Chemistry journal article supplement (doi:10.1039/b606613e), 2006-01-01
Supplement: b606613e.pdf [file b606613e.pdf]

## Supporting Information

### Design and synthesis of hydrophobic and chiral anions from amino acids as precursor for functional ionic liquids

Kenta Fukumoto and Hiroyuki Ohno

#### Characterization and physico-chemical properties of trifluoromethanesulfonyl amino acid methyl ester

##### **[I-Ala]: *N*-Trifluoromethanesulfonylalanine methyl ester**

From 3.2g (36 mmol) of L-alanine and equi-molar of trifluoromethanesulfonic anhydride, 5.2g of **I-Ala** was obtained (Yield: 63%).

<sup>1</sup>H NMR (500MHz, CDCl<sub>3</sub>, δ/ppm relative to TMS): 1.54 (d, *J*=3.8 Hz, 3H), 3.83 (s, 3H), 4.32 (q, *J*=10.8Hz, 1H), 5.68 (s, 1H). ESI-TOF-MS: Calcd. for C<sub>5</sub>H<sub>8</sub>NO<sub>4</sub>SF<sub>3</sub> [M-1+2Na]<sup>+</sup>: *m/z* = 280.15; Found: 280.06, [M-1]<sup>-</sup>: *m/z* = 234.17; Found: 233.82.

[α]<sub>D</sub><sup>25</sup> = -26.3 (*c* = 1.0 g/ 100 ml MeOH), *T*<sub>m</sub> = 68.0 °C, *T*<sub>decomp</sub> = 119.6 °C.

##### **[I-Val]: *N*-Trifluoromethanesulfonylvaline methyl ester**

From 4.2g (36 mmol) of L-valine and equi-molar of trifluoromethanesulfonic anhydride, 4.9g of **I-Val** was obtained (Yield: 53%).

<sup>1</sup>H NMR (500MHz, CDCl<sub>3</sub>, δ/ppm relative to TMS): 0.93 (d, *J*=3.5 Hz, 3H), 1.05(d, *J*=3.3 Hz, 3H), 2.22(m, *J*=16 Hz, 1H), 3.81 (s, 3H), 4.08 (q, *J*=6.5 Hz, 1H), 5.68 (d, *J*=4Hz, 1H). ESI-TOF-MS: Calcd. for C<sub>7</sub>H<sub>12</sub>NO<sub>4</sub>SF<sub>3</sub> [M-1+2Na]<sup>+</sup>: *m/z* = 308.21; Found: 308.09, [M-1]<sup>-</sup>: *m/z* = 262.23; Found : 261.83.

[α]<sub>D</sub><sup>25</sup> = -9.1 (*c* = 1.0 g/ 100 ml MeOH), *T*<sub>m</sub> = 44.6 °C, *T*<sub>decomp</sub> = 137.0 °C.

##### **[I-Leu]: *N*-Trifluoromethanesulfonylleucine methyl ester**

From 4.5g (34 mmol) of L-leucine and equi-molar of trifluoromethanesulfonic anhydride, 6.3 g of **I-Leu** was obtained (Yield: 66%).

<sup>1</sup>H NMR (500MHz, CDCl<sub>3</sub>, δ/ppm relative to TMS): 0.97 (d, *J*=5.8 Hz, 6H), 1.64 (m, *J*=28 Hz, 2H), 1.80 (m, *J*=16.8 Hz, 1H), 3.80 (s, 3H), 4.23 (q, *J*=7.3, 1H), 5.74 (s, 1H). ESI-TOF-MS: Calcd. for C<sub>8</sub>H<sub>14</sub>NO<sub>4</sub>SF<sub>3</sub> [M-1+2Na]<sup>+</sup>: *m/z* = 322.23; Found: 322.12, [M-1]<sup>-</sup>: *m/z* = 276.25; Found: 275.83.

[α]<sub>D</sub><sup>25</sup> = -28.2 (*c* = 1.0 g/ 100 ml MeOH), *T*<sub>m</sub> = 14.0 °C, *T*<sub>decomp</sub> = 132.9 °C.

### Characterization of ionic liquids

**[bmim][I-Ala]: 1-butyl-3-methylimidazolium trifluoromethanesulfonylalanine methyl ester salt**

$^1\text{H}$  NMR (500MHz,  $\text{CDCl}_3$ ,  $\delta/\text{ppm}$  relative to TMS): 0.95(t,  $J=7.5$ , 3H), 1.36(m,  $J=16.5\text{Hz}$ , 5H), 1.86(m,  $J=15\text{Hz}$ , 2H), 3.67(s, 3H), 4.01(s, 3H), 4.20(q,  $J=10\text{Hz}$ , 1H), 4.27(m,  $J=11.5\text{Hz}$ , 2H), 7.29(d,  $J=1\text{Hz}$ , 1H), 7.36(d,  $J=1\text{Hz}$ , 1H), 10.3(s, 1H). ESI–TOF–MS: Calcd. for  $[\text{C}_8\text{H}_{15}\text{N}_2][\text{C}_5\text{H}_7\text{NO}_4\text{SF}_3]$ :  $[\text{bmim}]^+$   $m/z = 139.22$ ; Found: 139.13,  $[\text{I-Ala}]^-$ :  $m/z = 234.17$ ; Found: 233.82.

**[bmim][I-Val]: 1-butyl-3-methylimidazolium trifluoromethanesulfonylvaline methyl ester salt**

$^1\text{H}$  NMR (500MHz,  $\text{CDCl}_3$ ,  $\delta/\text{ppm}$  relative to TMS): 0.94(m,  $J=13.75$ , 9H), 1.37(m,  $J=18.8\text{Hz}$ , 2H), 1.85(m,  $J=15.3\text{Hz}$ , 2H), 1.94(m,  $J=16.8\text{Hz}$ , 1H), 3.65(s, 3H), 3.82(d,  $J=3\text{Hz}$ , 1H), 4.04(s, 3H), 4.28(m,  $J=31.7\text{Hz}$ , 2H), 7.30(d,  $J=0.75\text{Hz}$ , 1H), 7.37(d,  $J=1\text{Hz}$ , 1H), 10.3(s, 1H). ESI–TOF–MS: Calcd. for  $[\text{C}_8\text{H}_{15}\text{N}_2][\text{C}_7\text{H}_{11}\text{NO}_4\text{SF}_3]$ :  $[\text{bmim}]^+$   $m/z = 139.22$ ; Found: 139.13,  $[\text{I-Val}]^-$ :  $m/z = 262.23$ ; Found: 261.81.

**[bmim][I-Leu]: 1-butyl-3-methylimidazolium trifluoromethanesulfonylleucine methyl ester salt**

$^1\text{H}$  NMR (500MHz,  $\text{CDCl}_3$ ,  $\delta/\text{ppm}$  relative to TMS): 0.91(q,  $J=5\text{Hz}$ , 6H), 0.96(t,  $J=7.5\text{ Hz}$ , 6H), 1.37(m,  $J=18.5\text{Hz}$ , 2H), 1.52(t,  $J=7\text{Hz}$ , 2H), 1.82(m,  $J=32.7\text{Hz}$ , 3H), 3.66(s, 3H), 4.02(s, 3H), 4.11(t,  $J=7\text{Hz}$ , 1H), 4.28(m,  $J=29\text{Hz}$ , 2H), 7.27(t,  $J=2.3\text{Hz}$ , 1H), 7.33(t,  $J=1.8\text{Hz}$ , 1H), 10.28(s, 1H). ESI–TOF–MS: Calcd. for  $[\text{C}_8\text{H}_{15}\text{N}_2][\text{C}_8\text{H}_{13}\text{NO}_4\text{SF}_3]$ :  $[\text{bmim}]^+$   $m/z = 139.22$ ; Found: 139.13,  $[\text{I-Leu}]^-$ :  $m/z = 276.25$ ; Found: 275.83.

**[TBP][I-Ala]: n-tetrabutylphosphonium trifluoromethanesulfonylalanine methyl ester salt**

$^1\text{H}$  NMR (500MHz,  $\text{CDCl}_3$ ,  $\delta/\text{ppm}$  relative to TMS): 0.97(t,  $J=7\text{ Hz}$ , 12H), 1.32(d,  $J=3.5\text{Hz}$ , 3H), 1.52(m,  $J=11.4\text{Hz}$ , 16H), 2.28 (m,  $J=14.5\text{Hz}$ , 8H), 3.74(s, 3H), 4.12(q,  $J=10.5\text{Hz}$ , 1H). ESI–TOF–MS: Calcd. for  $[\text{C}_{16}\text{H}_{36}\text{P}][\text{C}_5\text{H}_7\text{NO}_4\text{SF}_3]$ :  $[\text{TBP}]^+$ :  $m/z = 259.43$ ; Found: 259.33,  $[\text{I-Ala}]^-$ :  $m/z = 234.17$ ; Found: 233.82.

**[TBP][I-Val]: n-tetrabutylphosphonium trifluoromethanesulfonylvaline methyl ester salt**

$^1\text{H}$  NMR (500MHz,  $\text{CDCl}_3$ ,  $\delta/\text{ppm}$  relative to TMS): 0.89 (d,  $J=3.5\text{Hz}$ , 3H), 0.97 (t,  $J=7\text{Hz}$ , 15H), 1.52 (t,  $J=3.5\text{Hz}$ , 16H), 1.91 (m,  $J=17\text{Hz}$ , 1H), 2.27 (m,  $J=13.8\text{Hz}$ , 8H), 3.63 (s, 3H), 3.67 (d,  $J=3.5\text{Hz}$ , 1H). ESI–TOF–MS: Calcd. for  $[\text{C}_{16}\text{H}_{36}\text{P}][\text{C}_7\text{H}_{11}\text{NO}_4\text{SF}_3]$ :  $[\text{TBP}]^+$ :  $m/z = 259.43$ ; Found: 259.33,  $[\text{I-Val}]^-$ :  $m/z = 262.23$ ; Found: 261.83.

**[TBP][I-Leu]: n-tetrabutylphosphonium trifluoromethanesulfonylleucine methyl ester salt**

$^1\text{H}$  NMR (500MHz,  $\text{CDCl}_3$ ,  $\delta/\text{ppm}$  relative to TMS): 0.90(q,  $J=5.8\text{Hz}$ , 6H), 0.97(t,  $J=7\text{ Hz}$ , 12H),

1.51(m,  $J=6.5\text{Hz}$ , 18H), 1.79(m,  $J=20\text{Hz}$ , 1H), 2.28 (m,  $J=14.5\text{Hz}$ , 8H), 3.63(s, 3H), 4.03(t,  $J=7.3\text{Hz}$ , 1H). ESI-TOF-MS: Calcd. for  $[\text{C}_{16}\text{H}_{36}\text{P}][\text{C}_8\text{H}_{13}\text{NO}_4\text{SF}_3]$ :  $[\text{TBP}]^+$ :  $m/z = 259.43$ ; Found: 259.33,  $[\mathbf{I}\text{-Leu}]^-$ :  $m/z = 276.25$ ; Found: 275.83.
